# Supplementary material
Source: PubMed Central journal article supplement (PMC8724884)

**Figure S1**

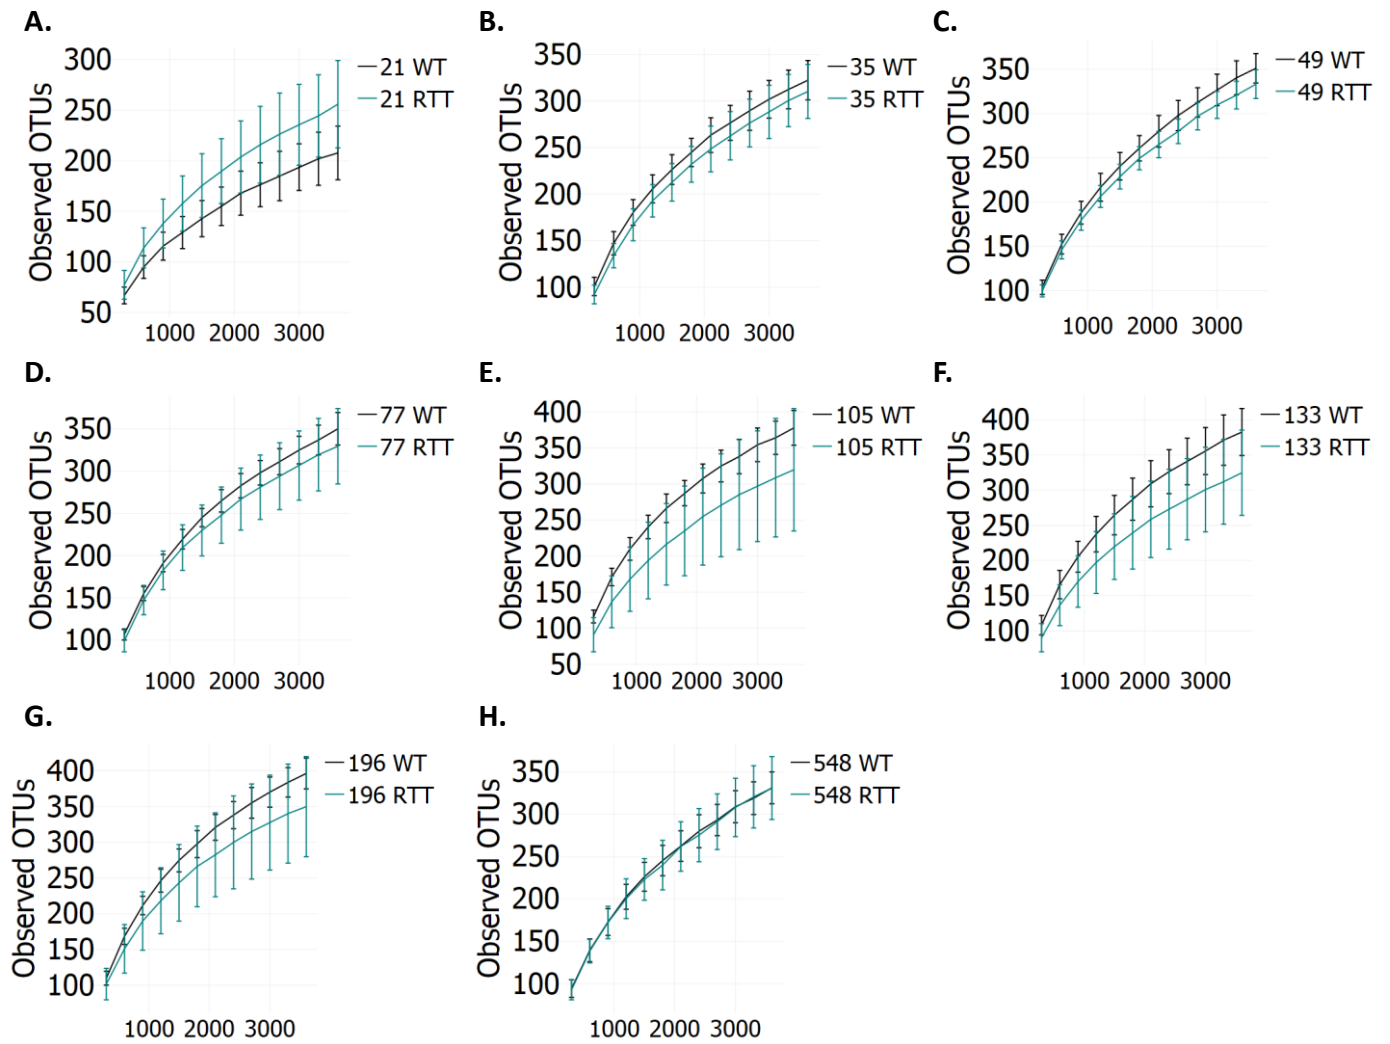

Figure S2

| Day        | Metric       |              |              |
|------------|--------------|--------------|--------------|
|            | BC           | UW           | W            |
|            |              |              |              |
| <b>35</b>  | 0.097        | 0.137        | 0.25         |
| <b>49</b>  | <b>0.007</b> | 0.115        | 0.085        |
| <b>77</b>  | <b>0.019</b> | <b>0.029</b> | 0.279        |
| <b>105</b> | <b>0.001</b> | <b>0.001</b> | <b>0.009</b> |
| <b>133</b> | <b>0.001</b> | <b>0.002</b> | 0.178        |
| <b>196</b> | <b>0.003</b> | <b>0.001</b> | 0.181        |
| <b>548</b> | <b>0.003</b> | <b>0.001</b> | <b>0.053</b> |

Figure S2

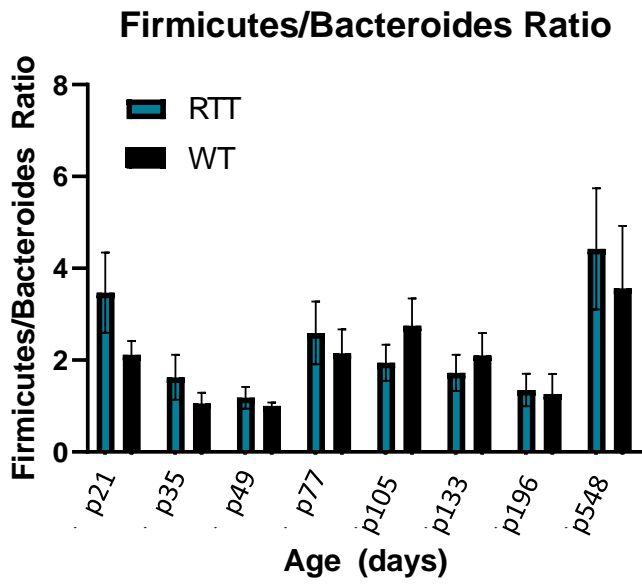

**Figure S4**

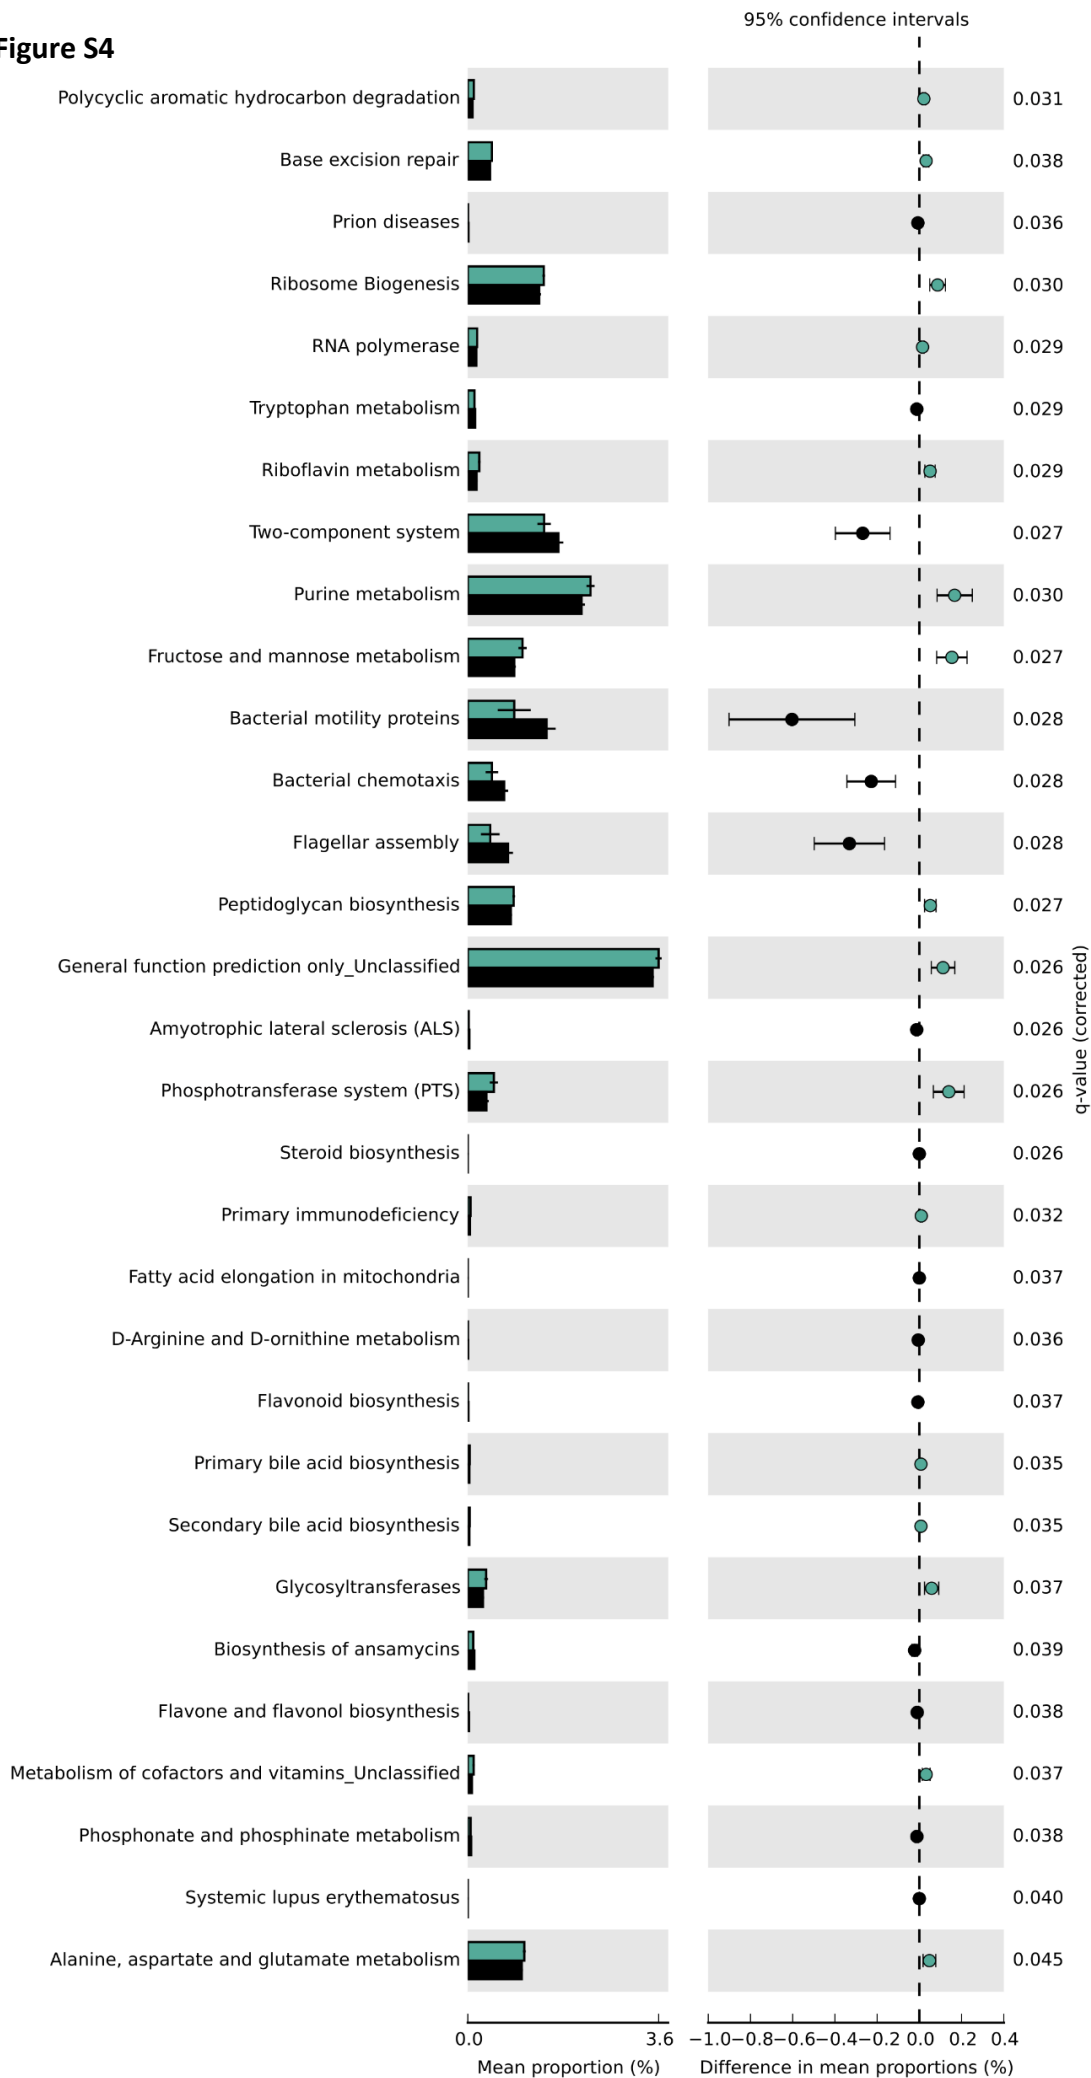

Figure S5

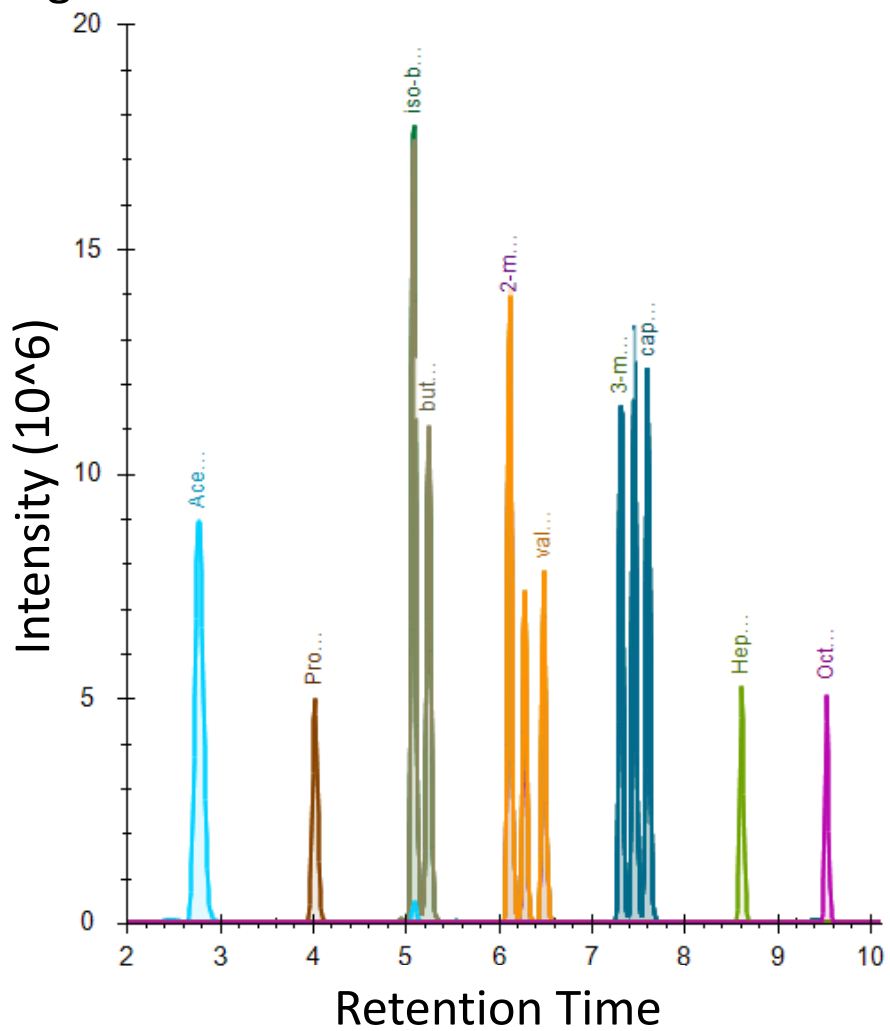

Supplement: NIHMS1755824-supplement-Supplement_1.pdf [file NIHMS1755824-supplement-Supplement_1.pdf]
