# Supplementary material
Source: PubMed Central journal article supplement (PMC8724884)
Supplement: NIHMS1755824-supplement-Supplement_2.pdf [file NIHMS1755824-supplement-Supplement_2.pdf]

A Gallucci - Shared microbial community changes in Rett Syndrome (Supplement)

Supplemental Table 1

| Age         | OTU                                                                                                                                       | RTT<br>Mean     | WT<br>Mean      | FDR<br>p-value |
|-------------|-------------------------------------------------------------------------------------------------------------------------------------------|-----------------|-----------------|----------------|
| <b>p21</b>  | n.s.                                                                                                                                      | n.s.            | n.s.            | n.s.           |
| <b>p35</b>  | n.s.                                                                                                                                      | n.s.            | n.s.            | n.s.           |
| <b>p49</b>  | n.s.                                                                                                                                      | n.s.            | n.s.            | n.s.           |
|             | n.s.                                                                                                                                      | n.s.            | n.s.            | n.s.           |
| <b>p77</b>  | n.s.                                                                                                                                      | n.s.            | n.s.            | n.s.           |
| <b>p105</b> | p__Firmicutes;c__Bacilli;o__Turicibacterales;<br>f__Turicibacteraceae;g__Turicibacter                                                     | 0.000001        | 0.000128        | 0.034          |
|             | <b>p__Bacteroidetes;c__Bacteroidia;<br/>o__Bacteroidales;f__Bacteroidaceae;<br/>g__Bacteroides;s__ovatus</b>                              | <b>0.000506</b> | <b>0.000068</b> | <b>0.034</b>   |
|             | <b>k__Bacteria;p__Firmicutes;c__Bacilli;<br/>o__Lactobacillales;f__Lactobacillaceae;<br/>g__Lactobacillus;s__ruminis</b>                  | <b>0.000578</b> | <b>0.000024</b> | <b>0.034</b>   |
|             | k__Bacteria;p__Verrucomicrobia;<br>c__Verrucomicrobiae;o__Verrucomicrobiales;<br>f__Verrucomicrobiaceae;g__Akkermansia;<br>s__muciniphila | 0.000282        | 0.000676        | 0.034          |
|             | p__Firmicutes;c__Clostridia;o__Clostridiales;<br>f__[Mogibacteriaceae]                                                                    | 0.000587        | 0.003411        | 0.034          |
|             | <b>p__Bacteroidetes;c__Bacteroidia;<br/>o__Bacteroidales;f__Bacteroidaceae;<br/>g__Bacteroides;s__uniformis</b>                           | <b>0.002976</b> | <b>0.000874</b> | <b>0.034</b>   |
|             | p__Proteobacteria;c__Deltaproteobacteria;<br>o__Desulfovibrionales;f__Desulfovibrionaceae;<br>g__Desulfovibrio                            | 0.001522        | 0.004543        | 0.034          |
|             | p__Firmicutes;c__Clostridia;o__Clostridiales;<br>f__Lachnospiraceae;g__Blautia                                                            | 0.068587        | 0.000649        | 0.034          |
|             | p__Firmicutes;c__Clostridia;o__Clostridiales;<br>f__Ruminococcaceae;g__Oscillospira                                                       | 0.028362        | 0.094498        | 0.034          |
|             | p__Firmicutes;c__Bacilli;o__Lactobacillales;<br>f__Lactobacillaceae;g__Pediococcus                                                        | 0.000628        | 0.000047        | 0.044          |
|             | p__Bacteroidetes;c__Bacteroidia;<br>o__Bacteroidales;f__[Odoribacteraceae];<br>g__Odoribacter                                             | 0.000311        | 0.001384        | 0.044          |
|             | <b>p__Bacteroidetes;c__Bacteroidia;<br/>o__Bacteroidales;f__Bacteroidaceae;<br/>g__Bacteroides</b>                                        | <b>0.066382</b> | <b>0.005045</b> | <b>0.044</b>   |
|             | <b>f__Ruminococcaceae</b>                                                                                                                 | <b>0.042262</b> | <b>0.096028</b> | <b>0.044</b>   |
|             | p__Firmicutes;c__Clostridia;o__Clostridiales                                                                                              | 0.123888        | 0.292810        | 0.044          |

|            |      |      |      |      |
|------------|------|------|------|------|
| <b>133</b> | n.s. | n.s. | n.s. | n.s. |
| <b>196</b> | n.s. | n.s. | n.s. | n.s. |
| <b>548</b> | n.s. | n.s. | n.s. | n.s. |

Supplemental Table 1 depicts OTUs significantly altered in RTT rats compared to WT across developmental timepoints (Bootstrap Mann-Whitney U test, FDR adjusted). Bold taxonomies depict bacteria that were also found to be altered in the same direction in published work on the microbiome in human RTT patients.

Table S2

| Citation                   | Behavior                                    | p21  | p35  | p49  | p77  | p105 | p133 | p177 | p196 | p270 | p360 | p450 | p548 |
|----------------------------|---------------------------------------------|------|------|------|------|------|------|------|------|------|------|------|------|
| Current Study, 2020        | Beta Div (Bray Curtis)                      | -    | n.s. | 0.01 | 0.02 | 0    | 0    | 0    | -    | -    | -    | -    | -    |
| Bhattacharjee et al., 2017 | Rotor Rod time                              | -    | 0    | 0    | 0    | 0    | -    | -    | -    | -    | -    | -    | -    |
| Bhattacharjee et al., 2017 | Somatic Sensitivity Force                   | -    | n.s. | n.s. | 0    | 0    | -    | -    | -    | -    | -    | -    | -    |
| Bhattacharjee et al., 2017 | Somatic Sensitivity                         | -    | -    | -    | -    | -    | -    | -    | -    | -    | -    | -    | -    |
| Bhattacharjee et al., 2017 | Temperature                                 | -    | n.s. | n.s. | 0    | 0    | 0    | -    | -    | -    | -    | -    | -    |
| Bhattacharjee et al., 2017 | Weight                                      | -    | n.s. | n.s. | 0    | 0    | 0    | -    | -    | -    | -    | -    | -    |
| Veeraragavan et al., 2016  | Seed opening skill loss                     | -    | n.s. | n.s. | 0    | -    | -    | -    | -    | -    | -    | -    | -    |
| Patterson et al., 2016     | Catwalk RH Swing speed                      | 0.01 | -    | n.s. | -    | -    | 0.05 | -    | 0.01 | n.s. | -    | n.s. | -    |
| Patterson et al., 2016     | Body Weight                                 | n.s. | -    | -    | 0.05 | -    | 0    | 0    | 0    | n.s. | 0.05 | 0.05 | 0.05 |
| Patterson et al., 2016     | Brain Weight                                | 0.05 | -    | -    | 0.01 | -    | -    | -    | -    | -    | -    | 0.01 | 0.01 |
| Patterson et al., 2016     | Symptom Score                               | 0.05 | -    | -    | -    | -    | 0    | 0    | 0.01 | -    | -    | -    | -    |
| Patterson et al., 2016     | Open field Distance                         | -    | -    | -    | -    | -    | -    | -    | -    | -    | -    | -    | -    |
| Patterson et al., 2016     | Traveled                                    | n.s. | -    | n.s. | n.s. | -    | n.s. | -    | n.s. | 0.05 | n.s. | n.s. | -    |
| Patterson et al., 2016     | Open field Average velocity                 | n.s. | -    | n.s. | n.s. | -    | -    | n.s. | -    | n.s. | 0.05 | n.s. | -    |
| Patterson et al., 2016     | Open Field Percent Time spent highly mobile | n.s. | -    | n.s. | n.s. | -    | 0.05 | -    | n.s. | 0.05 | n.s. | n.s. | -    |
| Patterson et al., 2016     | Rotor Rod latency to fall                   | n.s. | -    | n.s. | -    | -    | -    | -    | 0.01 | -    | -    | -    | -    |
| Patterson et al., 2016     | Catwalk crossing speed                      | n.s. | -    | n.s. | -    | -    | 0.01 | -    | 0.01 | n.s. | -    | n.s. | n.s. |
| Patterson et al., 2016     | Catwalk number of steps                     | n.s. | -    | n.s. | -    | -    | 0.05 | -    | 0.01 | n.s. | -    | n.s. | n.s. |
| Patterson et al., 2016     | Catwalk 3-paw support                       | 0.05 | -    | n.s. | -    | -    | n.s. | -    | n.s. | 0.05 | -    | 0    | 0    |
| Patterson et al., 2016     | Catwalk Base of Support                     | n.s. | -    | n.s. | -    | -    | 0.01 | -    | 0.01 | 0.01 | -    | 0    | 0    |
| Patterson et al., 2016     | Catwalk RF stride length                    | n.s. | -    | n.s. | -    | -    | 0.01 | -    | 0.01 | n.s. | -    | n.s. | 0.05 |
| Patterson et al., 2016     | Catwalk RF swing speed                      | n.s. | -    | n.s. | -    | -    | 0.05 | -    | 0.01 | n.s. | -    | n.s. | n.s. |
| Patterson et al., 2016     | Catwalk RH Stride length                    | n.s. | -    | n.s. | -    | -    | 0.05 | -    | 0.01 | n.s. | -    | n.s. | 0.01 |

Table S2 depicts p-values over time in previously published works on female RTT rats. “-” represents no data for the corresponding timepoint.
